# Supplementary material for: Prophylactic maintenance with venetoclax/azacitidine after reduced-intensity conditioning allogeneic transplant for high-risk MDS and AML
Source: PubMed Central journal article supplement — Blood Adv. 2024 Jan 12;8(4):978–90. doi: 10.1182/bloodadvances.2023012120 (PMC10883823; doi:10.1182/bloodadvances.2023012120), 2024-01-12
Supplement: BLOODA_ADV-2023-012120-mmc1.pdf [file BLOODA_ADV-2023-012120-mmc1.pdf]

## **Supplemental Material**

### **Table of Contents**

- 1. Supplemental Tables 1-9**
- 2. Supplemental Figures 1-6**
- 3. Supplemental Methods**
  - a. Clinical Trial**
  - b. Molecular MRD**
  - c. Immune Monitoring**
  - d. BH3 Profiling**
- 4. Supplemental References**

**Supplemental Table 1. Study Patient Disposition**

| <b>Patient Disposition</b>                | <b>N (%)</b> |
|-------------------------------------------|--------------|
| # total enrolled patients                 | 27 (100)     |
| # received Ven/FluBu2 conditioning        | 27 (100)     |
| # did not initiate maintenance            | 5 (18.5)     |
| Relapse, n (%)                            | 3 (60)       |
| Withdrawal, n (%)                         | 1 (20)       |
| Provider preference, n (%)                | 1 (20)       |
| # received Ven/Aza maintenance            | 22 (81.5)    |
| Dose Level 1 (42 days)                    | 11 (50)      |
| Dose Level 2 (28 days)                    | 11 (50)      |
| Death within 30 days of enrollment, n (%) | 0 (0)        |
| Death within 60 days of enrollment, n (%) | 0 (0)        |

**Supplemental Table 2. All treatment-emergent hematologic and non-hematologic toxicities (intent-to-treat, N=27)**

| Toxicity Grade CTCAE v5.0     | Dose Level           |   |   |   |                      |   |   |    | All<br>N=27 |   |    |    |
|-------------------------------|----------------------|---|---|---|----------------------|---|---|----|-------------|---|----|----|
|                               | Dose Level 1<br>n=13 |   |   |   | Dose Level 2<br>N=14 |   |   |    |             |   |    |    |
|                               | 1                    | 2 | 3 | 4 | 1                    | 2 | 3 | 4  | 1           | 2 | 3  | 4  |
|                               | N                    | N | N | N | N                    | N | N | N  | N           | N | N  | N  |
| HEMATOLOGIC                   |                      |   |   |   |                      |   |   |    |             |   |    |    |
| Anemia                        | 4                    | - | 4 | - | 2                    | 5 | 6 | -  | 6           | 5 | 10 | -  |
| Neutrophil count decreased    | -                    | 2 | 1 | 8 | 1                    | - | 1 | 11 | 1           | 2 | 2  | 19 |
| Platelet count decreased      | 1                    | 2 | 5 | 3 | -                    | 1 | 3 | 9  | 1           | 3 | 8  | 12 |
| WBC decreased                 | -                    | - | 4 | 7 | -                    | - | 1 | 12 | -           | - | 5  | 19 |
|                               |                      |   |   |   |                      |   |   |    |             |   |    |    |
| NON-HEMATOLOGIC               |                      |   |   |   |                      |   |   |    |             |   |    |    |
| Abdominal pain                | 1                    | - | - | - | -                    | - | - | -  | 1           | - | -  | -  |
| ALT increased                 | 5                    | 1 | - | - | 4                    | 1 | - | -  | 9           | 2 | -  | -  |
| ALK Phos increased            | 2                    | - | - | - | 2                    | - | - | -  | 4           | - | -  | -  |
| Anorexia                      | 1                    | 1 | - | - | 3                    | - | - | -  | 4           | 1 | -  | -  |
| Arthralgia                    | -                    | - | - | - | 1                    | 1 | - | -  | 1           | 1 | -  | -  |
| AST increased                 | 2                    | - | - | - | 4                    | - | - | -  | 6           | - | -  | -  |
| Bloating                      | -                    | - | - | - | 1                    | - | - | -  | 1           | - | -  | -  |
| Blood bilirubin increased     | 1                    | 1 | - | - | -                    | - | - | -  | 1           | 1 | -  | -  |
| Bone pain                     | -                    | - | - | - | 1                    | - | - | -  | 1           | - | -  | -  |
| Constipation                  | 1                    | - | - | - | 4                    | - | - | -  | 5           | - | -  | -  |
| Cough                         | -                    | - | - | - | 1                    | - | - | -  | 1           | - | -  | -  |
| Creatinine increased          | 3                    | - | - | - | 6                    | 2 | - | -  | 9           | 2 | -  | -  |
| Diarrhea                      | 7                    | 2 | - | - | 8                    | 1 | - | -  | 15          | 3 | -  | -  |
| Dizziness                     | 1                    | - | - | - | 2                    | - | - | -  | 3           | - | -  | -  |
| Dysgeusia                     | 3                    | - | - | - | 2                    | - | - | -  | 5           | - | -  | -  |
| Dyspepsia                     | -                    | - | - | - | 2                    | - | - | -  | 2           | - | -  | -  |
| Dyspnea                       | 1                    | 1 | - | - | -                    | - | - | -  | 1           | 1 | -  | -  |
| Dysuria                       | -                    | - | - | - | 1                    | - | - | -  | 1           | - | -  | -  |
| Fatigue                       | 2                    | 3 | - | - | 11                   | - | - | -  | 13          | 3 | -  | -  |
| Febrile neutropenia           | -                    | - | - | - | -                    | - | 1 | -  | -           | - | 1  | -  |
| Headache                      | 1                    | - | - | - | -                    | - | - | -  | 1           | - | -  | -  |
| Hyperkalemia                  | 1                    | - | - | - | 1                    | 1 | - | -  | 2           | 1 | -  | -  |
| Hyperuricemia                 | 1                    | - | - | - | 1                    | - | - | -  | 2           | - | -  | -  |
| Hypocalcemia                  | -                    | - | - | - | 3                    | 1 | - | -  | 3           | 1 | -  | -  |
| Hypomagnesemia                | 1                    | 1 | - | - | 4                    | - | - | -  | 5           | 1 | -  | -  |
| Lip pain                      | 1                    | - | - | - | -                    | - | - | -  | 1           | - | -  | -  |
| Mucositis oral                | -                    | - | - | - | 4                    | - | - | -  | 4           | - | -  | -  |
| Nail discoloration            | -                    | - | - | - | 1                    | - | - | -  | 1           | - | -  | -  |
| Nausea                        | 3                    | 3 | - | - | 9                    | 3 | - | -  | 12          | 6 | -  | -  |
| Parainfluenza infection       | -                    | - | - | - | 1                    | - | - | -  | 1           | - | -  | -  |
| Peripheral sensory neuropathy | -                    | - | - | - | 1                    | - | - | -  | 1           | - | -  | -  |
| Pruritus                      | 1                    | - | - | - | 1                    | - | - | -  | 2           | - | -  | -  |
| Rash maculo-papular           | 1                    | 1 | - | - | -                    | - | - | -  | 1           | 1 | -  | -  |
| Urinary frequency             | -                    | - | - | - | 1                    | - | - | -  | 1           | - | -  | -  |
| Vomiting                      | -                    | 1 | - | - | 1                    | - | - | -  | 1           | 1 | -  | -  |
| Weight loss                   | -                    | - | - | - | 2                    | - | - | -  | 2           | - | -  | -  |

All 27 patients enrolled into trial are included regardless of maintenance receipt (intent-to-treat). ALT, Alanine aminotransferase; Alk Phos, Alkaline phosphatase; AST, Aspartate aminotransferase; WBC, White blood cell

**Supplemental Table 3. Absolute neutrophil counts on maintenance.** Median neutrophil counts (K/ $\mu$ L) and inter-quartile ranges are provided at each timepoint per dose level.

| <b>Absolute Neutrophil Count (K/<math>\mu</math>L)</b> |                     |               |           |           |                     |               |           |           |
|--------------------------------------------------------|---------------------|---------------|-----------|-----------|---------------------|---------------|-----------|-----------|
|                                                        | <b>Dose Level 1</b> |               |           |           | <b>Dose Level 2</b> |               |           |           |
|                                                        | <b>N</b>            | <b>Median</b> | <b>Q1</b> | <b>Q3</b> | <b>N</b>            | <b>Median</b> | <b>Q1</b> | <b>Q3</b> |
| <b>Screen</b>                                          | 11                  | 3.3           | 2.2       | 7.5       | 11                  | 4.3           | 3.6       | 5.7       |
| <b>C1D1</b>                                            | 11                  | 4.1           | 2.2       | 4.7       | 11                  | 4.2           | 3.6       | 5.2       |
| <b>C1D8</b>                                            | 11                  | 2.7           | 2.5       | 4.1       | 11                  | 3.6           | 2.7       | 4.7       |
| <b>C1D15</b>                                           | 11                  | 1.4           | 1.2       | 3.0       | 11                  | 2.7           | 1.6       | 3.4       |
| <b>C1D22</b>                                           | 11                  | 1.1           | 0.54      | 2.1       | 11                  | 2.2           | 0.97      | 2.8       |
| <b>C2</b>                                              | 20                  | 2.4           | 1.3       | 1.8       | 20                  | 2.2           | 3.6       | 3.0       |
| <b>C3</b>                                              | 14                  | 2.1           | 1.6       | 1.7       | 20                  | 2.3           | 3.0       | 2.8       |
| <b>C4</b>                                              | 12                  | 2.4           | 1.3       | 2.2       | 16                  | 2.5           | 4.3       | 2.7       |
| <b>C5</b>                                              | 10                  | 2.5           | 1.6       | 2.1       | 15                  | 2.6           | 3.5       | 3.1       |
| <b>C6</b>                                              | 9                   | 2.5           | 1.9       | 1.7       | 14                  | 2.1           | 3.8       | 3.0       |
| <b>C7</b>                                              | 9                   | 2.4           | 1.3       | 5.1       | 12                  | 2.5           | 0.98      | 3.9       |
| <b>C8</b>                                              | 7                   | 2.3           | 1.0       | 2.7       | 11                  | 2.9           | 1.4       | 4.4       |
| <b>C9</b>                                              | -                   | -             | -         | -         | 12                  | 2.5           | 1.8       | 3.8       |
| <b>C10</b>                                             | -                   | -             | -         | -         | 10                  | 1.8           | 1.7       | 3.1       |
| <b>C11</b>                                             | -                   | -             | -         | -         | 10                  | 2.1           | 1.9       | 6.1       |
| <b>C12</b>                                             | -                   | -             | -         | -         | 10                  | 2.3           | 1.7       | 3.5       |

Day 1 and day 15 labs are shown at whole cycles for cycle 2 on-ward.

**Supplemental Table 4. Platelet counts on maintenance.** Median platelet counts (K/ $\mu$ L) and inter-quartile ranges are provided at each timepoint per dose level.

| <b>Platelet Level (K/<math>\mu</math>L)</b> |                     |               |           |           |                     |               |           |           |
|---------------------------------------------|---------------------|---------------|-----------|-----------|---------------------|---------------|-----------|-----------|
|                                             | <b>Dose Level 1</b> |               |           |           | <b>Dose Level 2</b> |               |           |           |
|                                             | <b>N</b>            | <b>Median</b> | <b>Q1</b> | <b>Q3</b> | <b>N</b>            | <b>Median</b> | <b>Q1</b> | <b>Q3</b> |
| <b>Screen</b>                               | 11                  | 97            | 85        | 140       | 11                  | 150           | 99        | 202       |
| <b>C1D1</b>                                 | 11                  | 104           | 83        | 135       | 11                  | 104           | 93        | 184       |
| <b>C1D8</b>                                 | 11                  | 104           | 78        | 122       | 11                  | 124           | 80        | 171       |
| <b>C1D15</b>                                | 11                  | 88            | 62        | 104       | 11                  | 104           | 58        | 147       |
| <b>C1D22</b>                                | 11                  | 115           | 68        | 127       | 11                  | 128           | 106       | 179       |
| <b>C2</b>                                   | 20                  | 105           | 77        | 133       | 20                  | 114           | 98        | 178       |
| <b>C3</b>                                   | 14                  | 109           | 76        | 147       | 20                  | 120           | 90        | 180       |
| <b>C4</b>                                   | 12                  | 137           | 113       | 210       | 16                  | 136           | 88        | 198       |
| <b>C5</b>                                   | 9                   | 117           | 95        | 212       | 16                  | 113           | 82        | 200       |
| <b>C6</b>                                   | 9                   | 132           | 103       | 216       | 14                  | 108           | 69        | 199       |
| <b>C7</b>                                   | 9                   | 148           | 97        | 230       | 12                  | 115           | 91        | 195       |
| <b>C8</b>                                   | 7                   | 102           | 98        | 210       | 11                  | 113           | 93        | 176       |
| <b>C9</b>                                   | -                   | -             | -         | -         | 12                  | 119           | 92        | 177       |
| <b>C10</b>                                  | -                   | -             | -         | -         | 10                  | 145           | 87        | 196       |
| <b>C11</b>                                  | -                   | -             | -         | -         | 10                  | 151           | 95        | 199       |
| <b>C12</b>                                  | -                   | -             | -         | -         | 10                  | 157           | 108       | 211       |

Day 1 and day 15 labs are shown at whole cycles for cycle 2 on-ward.

**Supplemental Table 5. Individual Patient Chimerism Status**

| Study ID | Disease Type | Ven/Aza Maint. (Y/N) | D28 CD3+ T-cells (%) | D28 marrow chimerism (%) | D100 CD3+ T-cells (%) | D100 marrow chimerism (%) | 6 mo. CD3+ T-cells (%) | 6 mo. Marrow chimerism (%) | 12 mo. CD3+ T-cells (%) | 12 mo. marrow chimerism (%) | Relapse* (Y/N) |
|----------|--------------|----------------------|----------------------|--------------------------|-----------------------|---------------------------|------------------------|----------------------------|-------------------------|-----------------------------|----------------|
| 23       | sAML         | Yes                  | 86                   | 100                      | 86                    | 98                        | 93                     | 100                        | 99                      | 100                         | No             |
| 24       | AML          | Yes                  | 49                   | n/a                      | 84                    | 99                        | 100                    | 100                        | 100                     | 100                         | Yes            |
| 25       | AML          | Yes                  | 86                   | 98                       | 88                    | 98                        | 98                     | 99                         | 95                      | 99                          | No             |
| 26       | t-AML        | Yes                  | 91                   | 100                      | 99                    | 97                        | 99                     | 85                         | -                       | -                           | Yes            |
| 27       | MDS          | No                   | 19                   | 97                       | 79                    | 12                        | -                      | -                          | -                       | -                           | Yes            |
| 28       | MDS          | Yes                  | 87                   | 100                      | 95                    | 99                        | 86                     | 72                         | -                       | -                           | Yes            |
| 29       | AML          | No                   | 70                   | 47                       | 80                    | 2                         | 85                     | 5                          | -                       | -                           | Yes            |
| 30       | t-MDS        | Yes                  | 79                   | 98                       | 81                    | 98                        | 90                     | 100                        | 100                     | 100                         | No             |
| 31       | MDS          | Yes                  | 52                   | 100                      | 65                    | 99                        | 71                     | 99                         | 98                      | 100                         | No             |
| 32       | MDS          | Yes                  | 47                   | 94                       | 60                    | 91                        | 61                     | 22                         | -                       | -                           | Yes            |
| 33       | AML          | Yes                  | 93                   | n/a                      | 97                    | 99                        | 99                     | 100                        | 100                     | 100                         | No             |
| 34       | MDS/MPN      | Yes                  | 68                   | 96                       | 64                    | 99                        | 71                     | 98                         | 100                     | 100                         | No             |
| 35       | AML          | Yes                  | 16                   | 99                       | 38                    | 85                        | -                      | -                          | -                       | -                           | Yes            |
| 36       | AML          | Yes                  | 57                   | 100                      | 68                    | 95                        | 96                     | 100                        | 100                     | 100                         | No             |
| 37       | MDS          | Yes                  | 27                   | 89                       | 64                    | 78                        | -                      | -                          | -                       | -                           | Yes            |
| 38       | MDS          | No                   | 69                   | 4                        | -                     | -                         | -                      | -                          | -                       | -                           | Yes            |
| 39       | MDS          | Yes                  | 75                   | 96                       | 82                    | 98                        | 85                     | 68                         | -                       | -                           | Yes            |
| 40       | AML          | Yes                  | 87                   | 99                       | 99                    | 100                       | 100                    | 100                        | 100                     | 100                         | No             |
| 41       | t-MDS        | Yes                  | 100                  | 98                       | 100                   | 96                        | 100                    | 100                        | 100                     |                             | Yes            |
| 42       | MDS          | Yes                  | 49                   | 98                       | 91                    | 97                        | 100                    | 100                        | n/a                     | 100                         | No             |
| 43       | MDS          | No                   | 48                   | 85                       | 82                    | 72                        | -                      | -                          | -                       | -                           | Yes            |
| 44       | t-AML        | No                   | 75                   | 99                       | 92                    | 99                        | 100                    | 100                        | 100                     | 100                         | No             |
| 45       | MDS          | Yes                  | 53                   | 99                       | 69                    | 97                        | 72                     | 96                         | 100                     | 100                         | No             |
| 46       | MDS          | Yes                  | 66                   | 99                       | 86                    | 99                        | n/a                    | 100                        | n/a                     | 100                         | No             |
| 47       | t-MDS        | Yes                  | 83                   | n/a                      | 97                    | 96                        | n/a                    | 100                        | n/a                     | 100                         | No             |
| 48       | t-MDS        | Yes                  | 80                   | 98                       | 83                    | 63                        | 83                     | 41                         | 99                      | 100                         | Yes            |
| 49       | MDS          | Yes                  | 15                   | 96                       | 41                    | 98                        | n/a                    | 100                        | 64                      | 98                          | No             |

**Supplemental Table 6. Individual Patient MRD Status**

| Study ID | Disease Type | Ven/Aza Maint. (Y/N) | TP53m at entry (Y/N) | Pre-HCT Flow MRD | Pre-HCT Molecular MRD | D28 Flow MRD | D28 Molecular MRD | D100 Flow MRD | D100 Molecular MRD | 6 mo. Flow MRD | 6 mo. Molecular MRD | 12 mo. Flow MRD | 12 mo. Molecular MRD | Relapse* (Y/N) |
|----------|--------------|----------------------|----------------------|------------------|-----------------------|--------------|-------------------|---------------|--------------------|----------------|---------------------|-----------------|----------------------|----------------|
| 23       | sAML         | Yes                  | No                   | Positive         | n/a                   | Negative     | Negative          | Negative      | Negative           | n/a            | Negative            | Negative        | Negative             | No             |
| 24       | AML          | Yes                  | Yes                  | Negative         | Positive              | n/a          | Negative          | Positive      | Positive           | Negative       | Negative            | Positive        | Positive             | Yes            |
| 25       | AML          | Yes                  | Yes                  | Negative         | Positive              | Negative     | Positive          | Negative      | Negative           | Negative       | Negative            | Negative        | Negative             | No             |
| 26       | t-AML        | Yes                  | Yes                  | Positive         | Positive              | Negative     | Negative          | Positive      | Positive           | n/a            | n/a                 | n/a             | n/a                  | Yes            |
| 27       | MDS          | No                   | No                   | Negative         | Positive              | n/a          | Positive          | n/a           | n/a                | n/a            | n/a                 | n/a             | n/a                  | Yes            |
| 28       | MDS          | Yes                  | Yes                  | Positive         | Negative              | Negative     | Negative          | Negative      | Negative           | Negative       | Negative            | n/a             | n/a                  | Yes            |
| 29       | AML          | No                   | No                   | Positive         | Positive              | n/a          | Positive          | Positive      | n/a                | n/a            | n/a                 | n/a             | n/a                  | Yes            |
| 30       | t-MDS        | Yes                  | No                   | Positive         | Positive              | Negative     | Negative          | Negative      | Negative           | Negative       | Negative            | Negative        | Negative             | No             |
| 31       | MDS          | Yes                  | Yes                  | Negative         | Positive              | Negative     | Negative          | Negative      | Negative           | Negative       | Positive            | Negative        | Negative             | No             |
| 32       | MDS          | Yes                  | Yes                  | Positive         | Positive              | Negative     | Positive          | Positive      | Positive           | Positive       | Positive            | Positive        | n/a                  | Yes            |
| 33       | AML          | Yes                  | No                   | Negative         | Positive              | Negative     | Negative          | Positive      | Positive           | Negative       | Negative            | Negative        | Negative             | No             |
| 34       | MDS/MPN      | Yes                  | No                   | Negative         | Positive              | Negative     | Positive          | Negative      | Positive           | Negative       | Positive            | Negative        | Negative             | No             |
| 35       | AML          | Yes                  | No                   | Positive         | Positive              | Negative     | Negative          | Positive      | Positive           | n/a            | n/a                 | n/a             | n/a                  | Yes            |
| 36       | AML          | Yes                  | Yes                  | Positive         | Positive              | Negative     | Negative          | Negative      | Negative           | Negative       | Negative            | Negative        | n/a                  | No             |
| 37       | MDS          | Yes                  | Yes                  | Positive         | Positive              | Negative     | Positive          | Negative      | Positive           | n/a            | n/a                 | n/a             | n/a                  | Yes            |
| 38       | MDS          | No                   | No                   | Positive         | Positive              | Positive     | Positive          | n/a           | n/a                | n/a            | n/a                 | n/a             | n/a                  | Yes            |
| 39       | MDS          | Yes                  | Yes                  | Negative         | Positive              | Negative     | Negative          | Negative      | Positive           | Positive       | Positive            | n/a             | n/a                  | Yes            |
| 40       | AML          | Yes                  | Yes                  | Negative         | Positive              | Negative     | Positive          | Negative      | Positive           | Negative       | Negative            | Negative        | Positive             | No             |
| 41       | t-MDS        | Yes                  | Yes                  | Positive         | Positive              | Positive     | Negative          | Positive      | Positive           | n/a            | n/a                 | n/a             | n/a                  | Yes            |
| 42       | MDS          | Yes                  | No                   | Positive         | Positive              | Negative     | Negative          | Positive      | Positive           | Negative       | Negative            | Negative        | Negative             | No             |
| 43       | MDS          | No                   | Yes                  | Positive         | Positive              | Positive     | Positive          | Positive      | n/a                | n/a            | n/a                 | n/a             | n/a                  | Yes            |
| 44       | t-AML        | No                   | No                   | Negative         | Positive              | Negative     | Positive          | Negative      | Negative           | Negative       | Negative            | Negative        | Negative             | No             |
| 45       | MDS          | Yes                  | Yes                  | Positive         | Positive              | Negative     | Positive          | Negative      | Positive           | Negative       | Positive            | Negative        | Negative             | No             |
| 46       | MDS          | Yes                  | No                   | Negative         | Positive              | Negative     | Positive          | Negative      | Negative           | Negative       | Negative            | Negative        | Negative             | No             |
| 47       | t-MDS        | Yes                  | Yes                  | Positive         | Positive              | Negative     | Negative          | Positive      | Positive           | Negative       | Negative            | Negative        | Negative             | No             |
| 48       | t-MDS        | Yes                  | Yes                  | Negative         | Positive              | Positive     | Negative          | Positive      | Positive           | Positive       | n/a                 | n/a             | n/a                  | Yes            |
| 49       | MDS          | Yes                  | Yes                  | Negative         | Positive              | Negative     | Positive          | Negative      | Negative           | Negative       | n/a                 | Negative        | n/a                  | No             |

\*At time of July 31, 2023 data-cut

Disconcordant flow/molecular MRD at matched timepoints are shaded in light blue.

Positive flow MRD in purple indicates cases where MRD was detected below <0.1%.

**Supplemental Table 7. QOL assessment during Ven/Aza maintenance therapy according to FACT-BMT.** Surveys were conducted at screening (on first day of conditioning/ pre-transplant; study entry) and then on cycle 1 day 1 (C1D1), cycle 2 day 1 (C2D1), and cycle 4 day 1 (C4D1) of Ven/Aza maintenance.

| FACT-BMT |          |       |      |      |       |      |      |       |      |      |       |      |
|----------|----------|-------|------|------|-------|------|------|-------|------|------|-------|------|
|          | Baseline |       |      | C1D1 |       |      | C2D1 |       |      | C4D1 |       |      |
|          | N        | Mean  | Std  | N    | Mean  | Std  | N    | Mean  | Std  | N    | Mean  | Std  |
| PWB      | 13       | 22.9  | 4.5  | 15   | 21.7  | 3.8  | 13   | 20.0  | 5.8  | 13   | 23.7  | 3.7  |
| SWB      | 13       | 26.6  | 2.1  | 15   | 23.7  | 3.5  | 13   | 24.7  | 3.6  | 13   | 25.5  | 3.2  |
| EWB      | 13       | 19.0  | 4.1  | 15   | 19.3  | 3.2  | 12   | 19.8  | 3.1  | 13   | 19.5  | 3.3  |
| FWB      | 13       | 17.3  | 4.9  | 15   | 12.6  | 4.3  | 12   | 14.7  | 6.0  | 12   | 19.3  | 4.8  |
| FACTG    | 13       | 85.8  | 11.4 | 15   | 77.2  | 10.8 | 12   | 78.9  | 14.3 | 12   | 88.8  | 11.1 |
| BMTS     | 13       | 28.6  | 5.1  | 15   | 27.3  | 5.4  | 13   | 26.2  | 6.1  | 13   | 29.3  | 4.5  |
| TOTAL    | 13       | 114.4 | 14.8 | 15   | 104.6 | 15.0 | 12   | 104.7 | 19.8 | 12   | 118.7 | 14.5 |
| TOI      | 13       | 68.8  | 11.7 | 15   | 61.6  | 10.9 | 12   | 60.0  | 15.6 | 12   | 73.2  | 10.7 |

| FACT-BMT differences between baseline and C1D1, C2D1, or C4D1 |               |       |      |         |                |       |       |         |                |       |       |         |
|---------------------------------------------------------------|---------------|-------|------|---------|----------------|-------|-------|---------|----------------|-------|-------|---------|
|                                                               | Baseline-C1D1 |       |      |         | Baseline -C2D1 |       |       |         | Baseline -C4D1 |       |       |         |
|                                                               | N             | Mean  | Std  | p-value | N              | Mean  | Std   | p-value | N              | Mean  | Std   | p-value |
| d PWB                                                         | 10            | 1.03  | 4.75 | 0.73    | 8              | 1.49  | 3.16  | 1       | 8              | 1     | 4.34  | 1       |
| d SWB                                                         | 10            | 2.7   | 2.58 | 0.039   | 8              | 2.23  | 3.16  | 0.13    | 8              | 2.1   | 3.58  | 0.38    |
| d EWB                                                         | 10            | 0.9   | 2.92 | 0.29    | 8              | -0.63 | 1.92  | 1       | 8              | -1.38 | 3.02  | 0.45    |
| d FWB                                                         | 10            | 5.74  | 3.43 | 0.002   | 8              | 4.16  | 4.41  | 0.13    | 8              | -0.33 | 5.34  | 1       |
| d FACTG                                                       | 10            | 10.37 | 8.35 | 0.02    | 8              | 7.25  | 10.13 | 0.29    | 8              | 1.4   | 10.76 | 0.73    |
| d BMTS                                                        | 10            | 0.86  | 4.28 | 1       | 8              | 0.92  | 4.23  | 1       | 8              | -0.16 | 4.36  | 1       |
| d TOTAL                                                       | 10            | 11.22 | 12   | 0.11    | 8              | 8.17  | 12.65 | 0.29    | 8              | 1.24  | 12.35 | 1       |
| d TOI                                                         | 10            | 7.62  | 9.14 | 0.11    | 8              | 6.57  | 8.8   | 0.29    | 8              | 0.52  | 9.74  | 1       |

**Supplemental Table 8. Gene List.**

|         |
|---------|
| ASXL1   |
| ATM     |
| BCOR    |
| BCORL1  |
| BRAF    |
| CALR    |
| CBL     |
| CEBPA   |
| CREBBP  |
| CSF3R   |
| CSNK1A1 |
| CUX1    |
| DDX41   |
| DNMT3A  |
| EP300   |
| ETNK1   |
| ETV6    |
| EZH2    |
| FLT3    |
| GATA2   |
| GNAS    |
| GNB1    |
| IDH1    |
| IDH2    |
| IKZF1   |
| JAK2    |
| KIT     |
| KRAS    |
| MPL     |
| MYC     |
| NF1     |
| NFE2    |
| NPM1    |
| NRAS    |
| PDS5B   |
| PHF6    |
| PPM1D   |
| PRPF8   |
| PTPN11  |
| RAD21   |
| RIT1    |
| RUNX1   |
| SETBP1  |
| SF3B1   |
| SH2B3   |
| SMC1A   |
| SMC3    |
| SRSF2   |

|       |
|-------|
| STAG2 |
| TERT  |
| TET2  |
| TP53  |
| U2AF1 |
| WT1   |
| ZRSR2 |

**Supplemental Table 9.** Conjugated monoclonal antibodies used in immune monitoring panels.

| TUBE            | TARGET                          | FLUOROCHROME | CLONE                |
|-----------------|---------------------------------|--------------|----------------------|
| T Cells         | CD25                            | FITC         | m-A251               |
|                 | PD-1                            | PE           | J105                 |
|                 | CD95                            | PeCF594      | DX2                  |
|                 | TCR $\alpha\beta$               | PeCy 7       | IP26                 |
|                 | CD127                           | APC          | eBioRDR5             |
|                 | CD8                             | Alexa 700    | RPA-T8               |
|                 | TCR $\gamma\delta$              | APC Vio 770  | 11F2                 |
|                 | TIM 3                           | BV421        | F38-2E2              |
|                 | CD4                             | BV510        | RPA-T4               |
|                 | CD45RA                          | BV605        | HL100                |
|                 | CD31                            | BV650        | M-T605               |
|                 | CCR7                            | BV711        | G043-H7              |
|                 | CD3                             | BV786        | UCHT1                |
| B Cells         | BAFF-R CD268                    | FITC         | 8A7                  |
|                 | IgD                             | PE           | IA6-2                |
|                 | CD27                            | PeCy 5       | O323                 |
|                 | CD38                            | PeCy 7       | HIT2                 |
|                 | CD19                            | APC          | HIB19                |
|                 | CD20                            | APC Cy 7     | 2H7                  |
|                 | CD5                             | BV711        | UCHT2                |
|                 | CD45                            | BV510        | H130                 |
|                 | CD6                             | BV650        | M-T605               |
|                 | CD3                             | BV786        | UCHT1                |
|                 | CD166                           | BV421        | 3A6                  |
| NK Cells        | CD16                            | FITC         | 3G8                  |
|                 | PD-1                            | PE           | J105                 |
|                 | CD95                            | PeCF594      | DX2                  |
|                 | NKG2D                           | APC          | 1D11                 |
|                 | CD8                             | Alexa 700    | RPA-T8               |
|                 | CD3                             | BV786        | UCHT1                |
|                 | CD56                            | BV605        | NCAM                 |
|                 | CD6                             | BV650        | M-T605               |
|                 | CD57                            | PerCP Cy5.5  | HNK-1                |
|                 | NKG2A                           | BV421        | 131411               |
|                 | KIRs<br>(CD158a/CD158b/CD158e)  | PeCy7        | HP-MA4/DX27/DX9      |
| Dendritic Cells | CD123                           | FITC         | AC145                |
|                 | CD141                           | PE           | 1A4                  |
|                 | CD11c                           | PeCy 5       | B-LY6                |
|                 | LINEAGE<br>(CD3/CD19/CD56/CD14) | PeCy 7       | SK7/SJ25C1/B159/M5E2 |
|                 | CD86                            | APC          | 2331 (FUN1)          |
|                 | CD45                            | APC Cy 7     | 2D1                  |
|                 | CD14                            | BV605        | M5E2                 |
|                 | HLA-DR                          | BV510        | G46-6                |
|                 | PD-L1                           | BV786        | MIH1                 |
|                 | CD166                           | BV421        | 3A6                  |

## Supplemental Figures

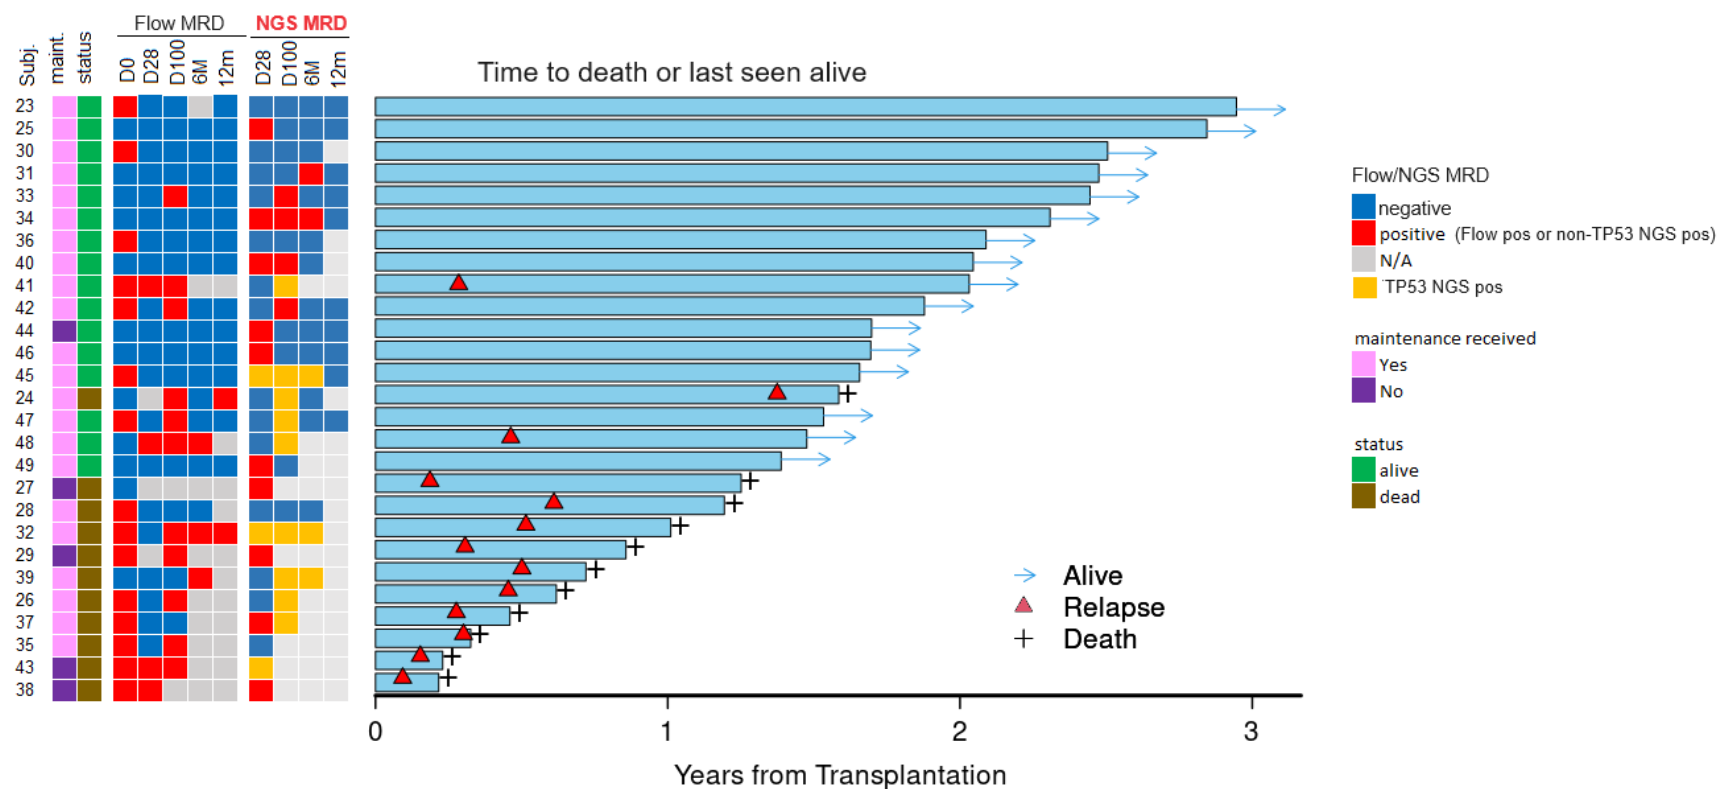

**Supplemental Figure 1. Flow- and Molecular-MRD.** Swimmer plot for intent-to-treat cohort (N=27) and time to death or last known alive. The accompanying heatmap indicates disease status over time (D0, D28, D100, 6M, 12M), flow and molecular (or NGS)-MRD status, maintenance receipt, and survival status. D0, day 0; D28, day 28 after transplant; D100, day 100 after transplant; 6M, 6 months after transplant; and 12M, 12 months after transplant. Relapse indicated by red filled triangle.

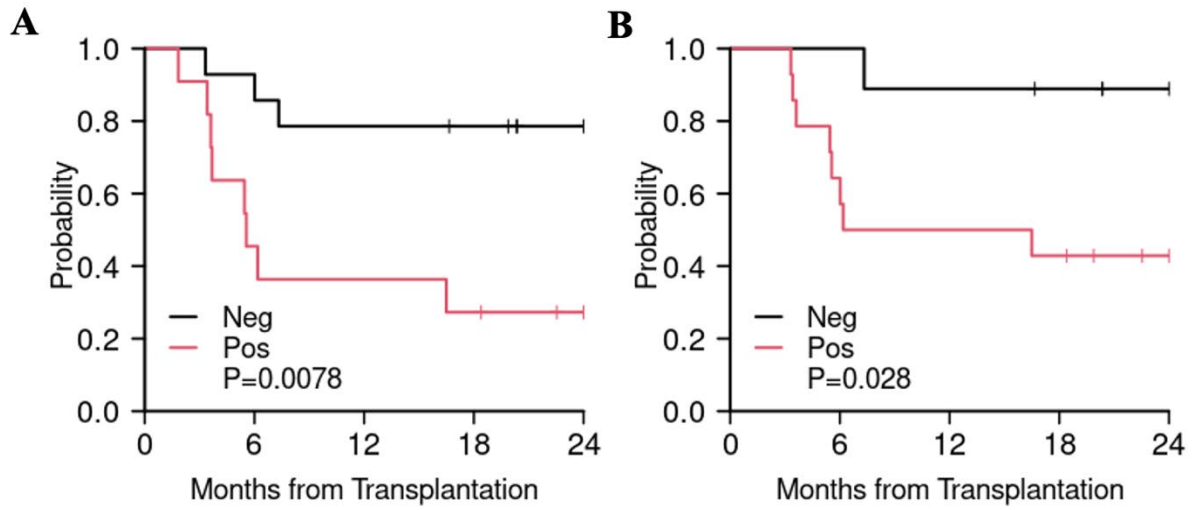

**Supplemental Figure 2. Flow and Molecular MRD and Outcome on Maintenance.** Shown are K-M curves based on MRD status. PFS based on (A) flow MRD status at day +100 and (B) molecular MRD at day +100.

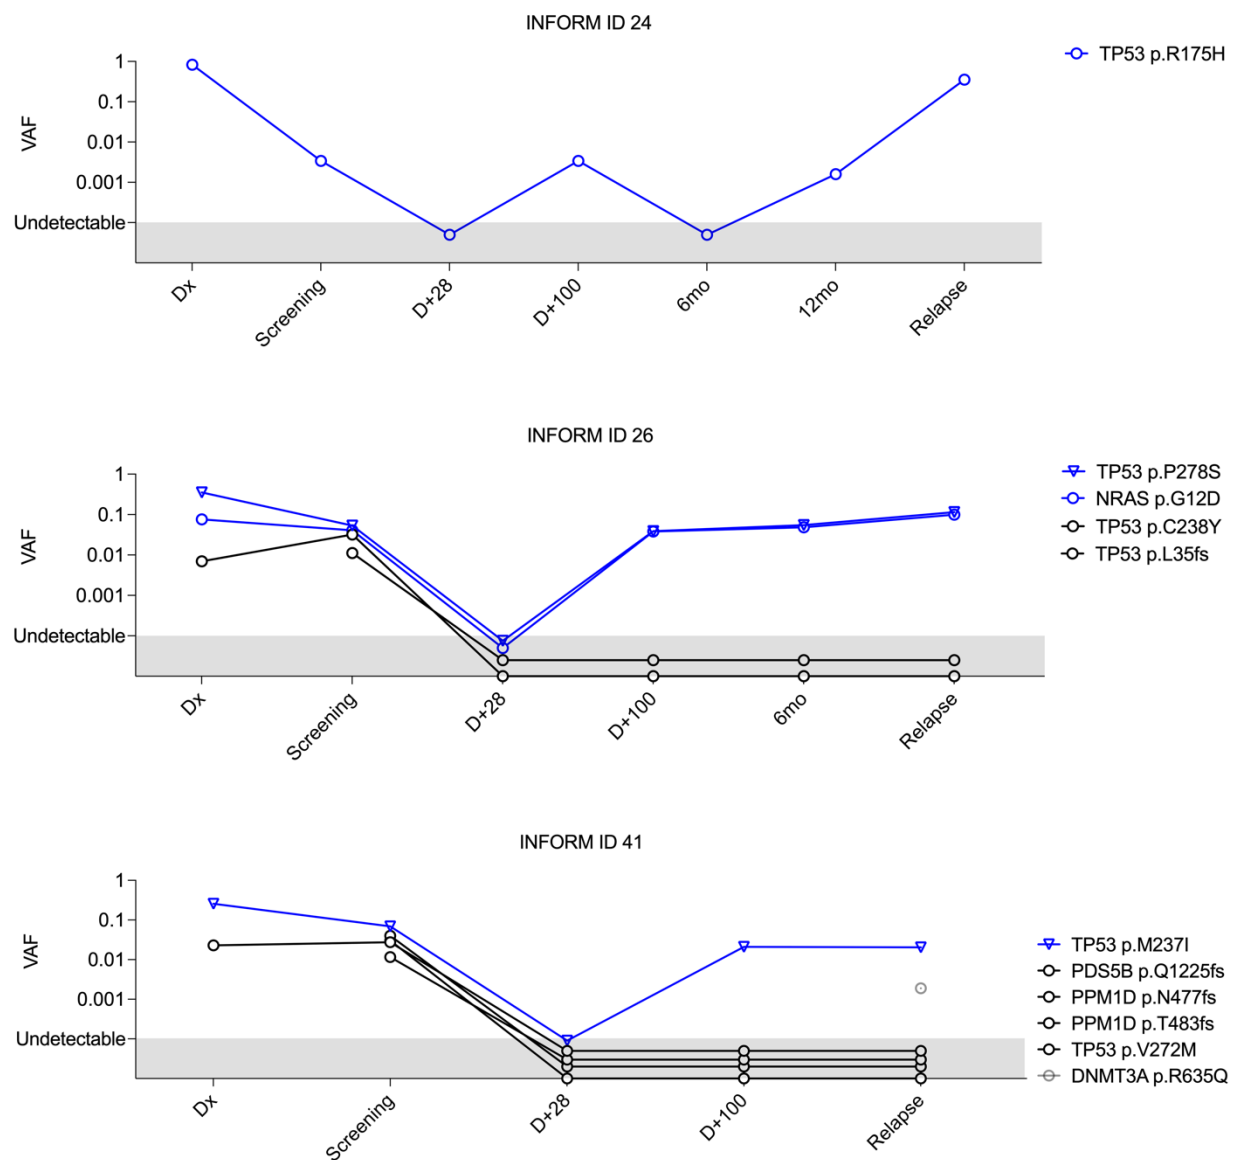

**Supplemental Figure 3. Day 28 Molecular MRD negativity in *TP53*-mutated disease.** Three patient examples including (A) ID 24, (B) ID 26, and (C) ID 41 with *TP53*-mutated disease and negative molecular MRD assessment at day +28 who subsequently relapsed, suggesting negative molecular MRD at an early time point such as day +28 may be falsely reassuring. Blue symbols and lines indicate pre-alloSCT mutations detected at relapse, black symbols indicate pre-alloSCT mutations not identified at relapse, with gray variants indicating newly detected variants at relapse.

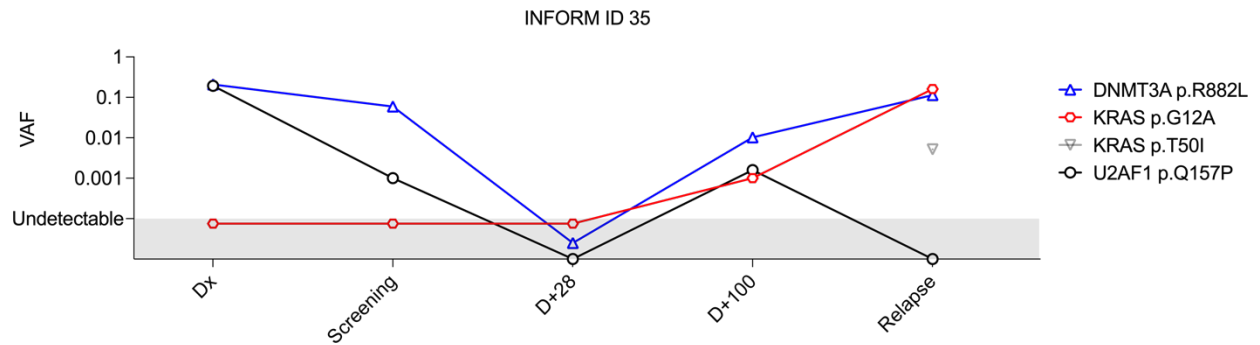

**Supplemental Figure 4. Detection of subclonal KRAS mutations at time of relapse after transplant.** Emergence of new mutations at day +100 preceding relapse that include MAPK signaling genes (KRAS) that were not previously detectable. Blue symbols and lines indicate pre-alloSCT mutations detected at relapse, black symbols indicate pre-alloSCT mutations not identified at relapse, gray indicates newly detected variants at relapse, and red symbols indicate mutations present at post-HSCT time-points and at relapse.

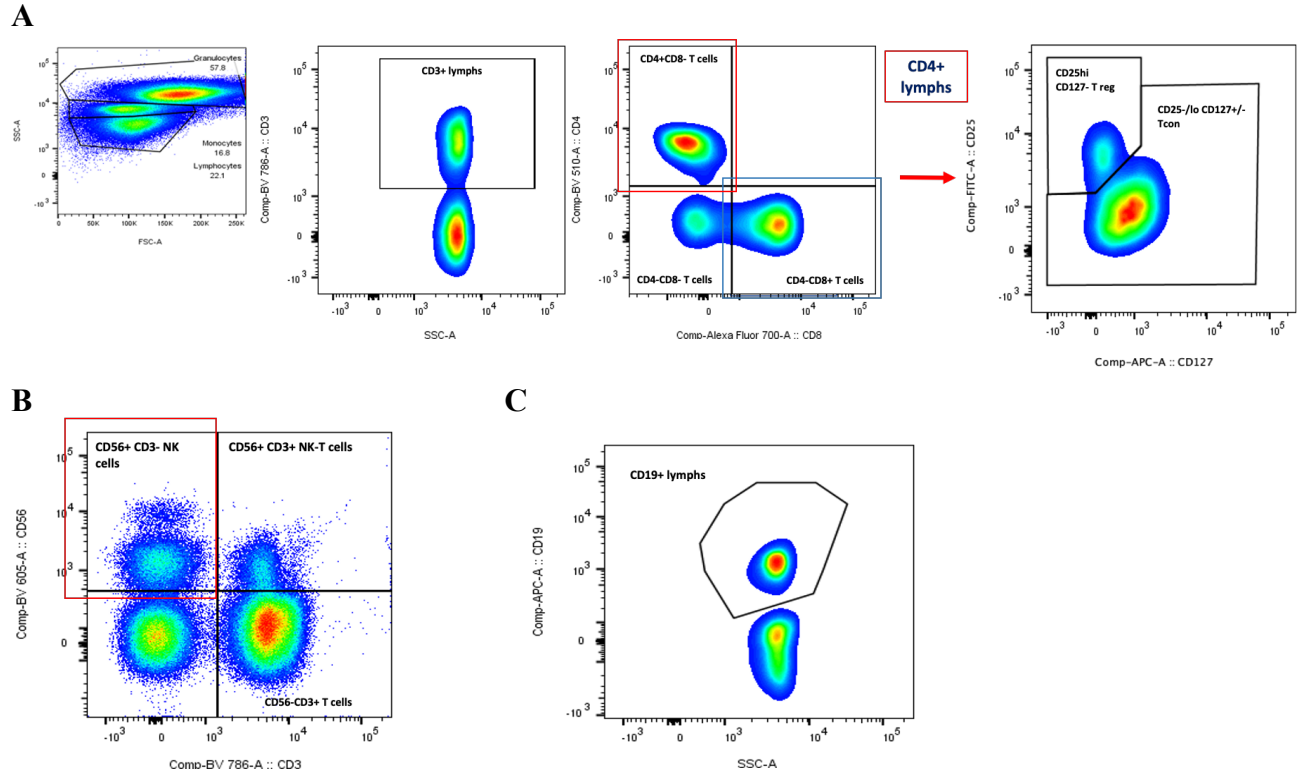

**Supplemental Figure 5. Immune profiling on maintenance. A)** Gating strategy for T cell subset analysis. Three major T cell populations, CD4Treg, CD4Tcon, and CD8 T cells, were defined as  $CD3^+CD4^+CD8^-CD25^+CD127^-$ ,  $CD3^+CD4^+CD8^-CD25^{-/low}CD127^{+/-}$  cells and  $CD3^+CD4^-CD8^+$ , respectively. **B)** Gating strategy for Nk cells and Nk-T cells. NK cells were defined as  $CD3^-CD56^+$  lymphocytes and divided in 4 subsets based on the expression of CD56 and CD16:  $CD56^{bright}CD16^-$ ,  $CD56^{dim}CD16^+$ ,  $CD56^{dim}CD16^-$  and  $CD56^{bright}CD16^+$  NK cells. NKT cells were defined as  $CD3^+CD56^+$  lymphocytes. **C)** Gating strategy for B cells. B cells were defined as  $CD45^+CD19^+$  lymphocytes. See **Supplemental Table 9** for markers used in immune monitoring panels.

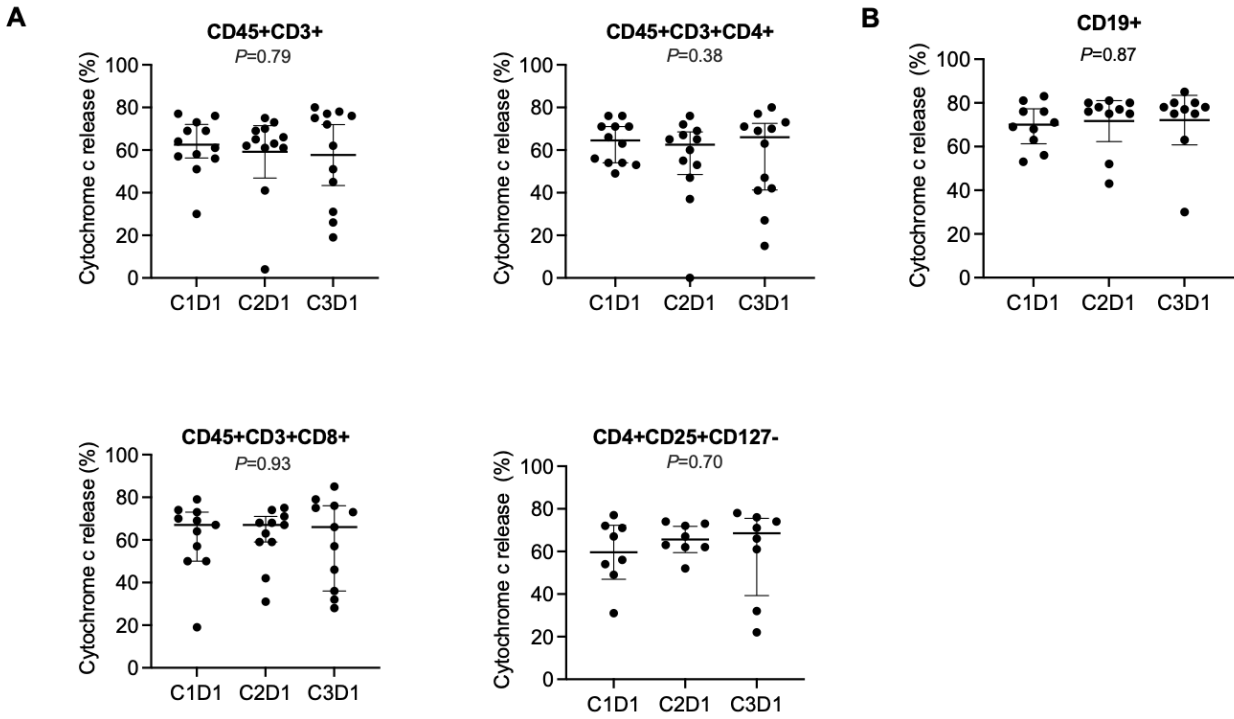

**Supplemental Figure 6. BH3 profiling immune cells subsets.** Peripheral blood samples were collected from patients on Ven/Aza maintenance pre-dose on cycle 1 day 1 (C1D1), cycle 2 day 1 (C2D1), and cycle 3 day 1 (C3D1). Peripheral blood mononuclear cells (fresh) underwent BH3 profiling. At least 50 events/population per well were required for analysis. BH3 peptides (BIM BH3 peptide (0.1  $\mu$ M)) were used to measure cytochrome c release (to indicate mitochondrial apoptotic priming sensitivity). One-way repeated measures anova for % cytochrome c release across the three timepoints was applied. **(A)** T cells subpopulations were gated using CD45+CD3+, CD45+CD3+CD4+, CD3+CD8+ and CD45+CD3+CD4+ CD25+ CD127- (T regulatory cell subset) immunophenotypic markers. **(B)** B cells populations were gated using CD45+CD19+ immunophenotypic markers. At each timepoint, the bar represents the median cytochrome c release (%) and inter-quartile ranges are provided.

## Supplemental Methods

### 1. Clinical Trial Design

**Eligible patient population details:** Eligible patients were at least 18 years and included those with an Eastern Cooperative Oncology Group (ECOG) performance status (PS) of 0 to 2, adequate organ function, an available 8/8 HLA-matched related or unrelated donor with peripheral blood stem cells as source, and a diagnosis of one of the following: (1) high-risk AML defined as adverse risk by ELN 2017,<sup>1</sup> secondary/therapy-related or secondary-type ontogeny,<sup>2</sup> or persistent flow MRD ( $\geq 0.1\%$ ); (2) higher-risk MDS defined as International Prognostic Scoring System intermediate-2 or high at diagnosis,<sup>3</sup> therapy-related, or presence of a mutation in *TP53* or in the *RAS* pathway;<sup>4</sup> or (3) high-risk MDS/myeloproliferative neoplasm (MPN) defined as the presence of trisomy 8, chromosome 7 abnormalities, or complex karyotype or a mutation in *ASXL1*. Prior venetoclax therapy was allowed. Patients with MDS or MDS/MPN were required to enter the study with  $\leq 10\%$  marrow blasts, while those with AML were required to have  $<5\%$  marrow blasts.

**Conditioning treatment details:** Venetoclax was dosed at 400 mg daily on day -8 to day -2 for a total of 7 doses. Fludarabine 30 mg/m<sup>2</sup>/day was administered as a bolus intravenous infusion over 30 minutes once a day for 4 days on day -5 to day -2. Busulfan 0.8 mg/kg was administered intravenously twice daily over 3 hours on day -5 to day -2 for a total of 8 doses.

**Trial Design Details:** A minimum of ten patients per maintenance dose schedule were planned accounting for up to 11% potential drop-out for early events. The recommended phase 2 dose

(RP2D) or best tolerated schedule was determined if  $\leq 2$  patients experienced DLT. The probability of dose escalation is 0.93 if the true but unknown rate of DLT is 10% but 0.17 if the rate is 40%. With 10 patients at the MTD level, the maximum width of 90% confidence interval for DLT will be within  $\pm 28\%$ .

## 2. Sequencing and mutational analysis

Clinical and research-level next-generation sequencing (NGS) assays were performed as previously described.<sup>5</sup> Samples were collected at diagnosis, screening (pre-transplant), and post-transplant timepoints. The clinical 88-gene targeted sequencing assay (sensitivity estimated to be 3%) was performed in a Clinical Laboratory Improvement Amendments–certified laboratory in real-time.<sup>6</sup> A research-level duplex NGS assay was used in screening (pre-transplant) and in post-transplant MRD surveillance samples allowing for more sensitive detection of persistent variants. Assays were performed in batches. Mutations identified at diagnosis or at >1% variant allele fraction in the screening/pre-SCT sample were evaluated for persistence after SCT. Any persistent mutation (at least two duplex alternative reads) was considered to be “molecular MRD-positive.”

*Duplex Next Generation Sequencing:* We selected 45 genes for targeted sequencing based on their recurrent alteration in myeloid malignancies (**Supplemental Table 8**). Library construction, quantification, normalization, hybrid selection, cluster amplification, and sequencing were performed as previously described by our group in Garcia et al *Blood Advances* 2021, and are reproduced below.<sup>5</sup>

*Library Construction, quantification, and normalization:* 500ng genomic DNA was used as input for DNA fragmentation using a Covaris acoustic ultrasonicator, targeting 150 bp fragments. Library preparation was performed using the KAPA Biosystems (KAPA HyperPrep Kit with Library Amplification product KK8504) and IDT’s duplex UMI adapters. The libraries were then paired with unique 8-base dual index sequences embedded within the p5 and p7 primers

(IDT) during PCR. Enzymatic cleanups were performed using Beckman Coulter AMPure XP beads. Libraries were quantified using the INvitrogen Quant-It broad range dsDNA quantification assay kit (Thermo Scientific) with a 1:200 PicoGreen dilution. Each library was normalized to 35ng/uL using Tris-HCl, 10 mM, pH 8.0.

*Hybrid Selection, Cluster Amplification, and Sequencing:* In solution hybrid selection was performed using IDT's XGen hybridization and wash kit, with creation of 12-plex pre-hybridization pools. Custom exome bait (TWIST bioscience) was added to the lyophilized pool prior to resuspension, followed by library normalization and hybridization performed using a Hamilton Starlet liquid handling platform and target capture on an Agilent Bravo automated platform. Post capture, a PCR was performed to amplify the captured DNA. Cluster amplification using Exclusion Amplification cluster chemistry and HiSeq amplification was performed according to manufacturer's protocol (Illumina) and using HiSeq X flowcells. Flowcells were sequenced on v2 Sequencing-bySynthesis chemistry for HiSeq X flowcells. The flowcells were then analyzed using RTA v.2.7.3 or later. Each pool of whole genome libraries was run on paired 151 bp runs, reading the dual-indexed sequences to identify molecular indices and sequenced across the number of lanes needed to meet coverage for all libraries in the pool.

*Variant calling:* Reads were aligned with bwa-mem 0.7.15. Duplex consensus reads were called with fgbio 1.0 and realigned using bwa-mem. Consensus reads were required to have reads from both families  $\alpha\beta$  and  $\beta\alpha$ , and consensus reads with Ns in excess of 5% of bases were discarded. Read one and two were soft-clipped from the 5' end by 10 bases to reduce errors due to end repair. Single nucleotide and small insertion and deletion calling was performed with samtools-

0.1.18 mpileup and Varscan 2.2.3. Variants were annotated to include information about cDNA and amino acid changes, sequence depth, number, and percentage of reads supporting the variant allele, population allele frequency in the Genome Aggregation Database (gnomAD). Variants were excluded if they had fewer than two total duplex-reassembled alternate reads at the position or fell outside of the target coordinates, caused synonymous changes, or were recurrent small insertions/deletions at low variant allele fraction adjacent to homopolymer repeat regions. Individual single nucleotide substitutions and small insertions or deletions were evaluated as candidate drivers of myeloid malignancies based on gene-specific characteristics, then curated manually and classified as driver mutations based on genetic criteria and literature review. All interpretation of variants was blinded to clinical characteristics and thus agnostic to variables including age, sex, diagnosis, treatment status, and clinical outcomes; the genetic analysis was completed and locked prior to merging with any clinical data.

### 3. Flow cytometry

Flow cytometry staining for immune reconstitution analysis was performed on fresh whole blood samples collected at specific timepoints after transplantation (namely, 1 month, 2 months, 3 months, day +100, 6 months and 12 months). Overall, in the experimental cohort, flow cytometry data on paired samples were available on 26 patients of whom 22 received Ven/Aza maintenance on study. Flow cytometry data on a control cohort of 25 patients with AML/MDS that received a RIC matched transplantation with Flu/Bu and a standard GVHD prophylaxis with methotrexate (MTX)-tacrolimus (TAC), were used as comparison.

Four panels of directly conjugated monoclonal antibodies (**Supplemental Table 9**) were used to define functionally distinct immune cell subsets and homeostatic characteristics of each subset. After staining, cells were acquired on a Fortessa LSR flow cytometer (BD) and analyzed using FlowJo™ Software v10. Specific cell gating strategy and markers used for cell subset definition are described in **Supplemental Figure 5**. For analysis, both percentages and absolute numbers of the parental cells were considered. Absolute numbers were calculated from the complete blood cell count (CBC) performed on the same day as flow cytometry analysis.

#### 4. BH3 profiling

BH3 profiling was performed using the Eppendorf epMotion 5075I automated pipetting platform (Eppendorf, Enfield, CT, USA).<sup>7</sup> Bone marrow mononuclear cells were exposed to synthetic BH3 peptides after plasma membrane permeabilization with digitonin and sensitivity to BH3 peptides was measured by cytochrome c release using an iQue Screener Plus VBR flow cytometer, which uses Forecyt version 9 software for acquisition, gating, and data export (Essen Bioscience/Sartorius, Ann Arbor, MI). Cytochrome c (Biolegend 983502) was stained overnight and the median fluorescence intensity (MFI) was calculated for each cell population. FMO served as a control well lacking the cytochrome c antibody. Cytochrome c release was calculated using the following formula:

$$MFI - MFI_{Cyto\ c\ Release} = 1 - \frac{MFI_{sample} - MFI_{FMO}}{MFI_{buffer\ alone} - MFI_{FMO}}$$

Values reported are the average of two technical duplicates for every treatment. DMSO and alamethicin were used as negative and positive controls, respectively. Cells were gated based on the following: CD45+CD19+ for B-cells, CD45+CD3+CD8+ for CD8+ T-cells, CD45+CD3+CD4+ for CD4+ T-cells, and CD45+CD3+CD4+CD127-CD25+ for T-regulatory cells. A minimum of 50 events per population per well was required to calculate cytochrome c release. All antibodies were obtained from Biolegend, including cytochrome c FITC (983502), CD3 BV421 (300434), CD127 PE0Dazzle594 (351336), CD25 Alexa647 (356128), CD45 APC-Cy7 (368516), CD4 BV521 (357420), and CD8 BV605 (344742).

## Supplemental References

1. Dohner H, Estey E, Grimwade D, et al. Diagnosis and management of AML in adults: 2017 ELN recommendations from an international expert panel. *Blood*. 2017;129(4):424-447.
2. Lindsley RC, Mar BG, Mazzola E, et al. Acute myeloid leukemia ontogeny is defined by distinct somatic mutations. *Blood*. 2015;125(9):1367-1376.
3. Greenberg P, Cox C, LeBeau MM, et al. International scoring system for evaluating prognosis in myelodysplastic syndromes. *Blood*. 1997;89(6):2079-2088.
4. Lindsley RC, Saber W, Mar BG, et al. Prognostic Mutations in Myelodysplastic Syndrome after Stem-Cell Transplantation. *N Engl J Med*. 2017;376(6):536-547.
5. Garcia JS, Kim HT, Murdock HM, et al. Adding venetoclax to fludarabine/busulfan RIC transplant for high-risk MDS and AML is feasible, safe, and active. *Blood Adv*. 2021;5(24):5536-5545.
6. Kluk MJ, Lindsley RC, Aster JC, et al. Validation and Implementation of a Custom Next-Generation Sequencing Clinical Assay for Hematologic Malignancies. *J Mol Diagn*. 2016;18(4):507-515.
7. Ryan J, Montero J, Rocco J, Letai A. iBH3: simple, fixable BH3 profiling to determine apoptotic priming in primary tissue by flow cytometry. *Biol Chem*. 2016;397(7):671-678.
